# Supplementary material for: Effective design of PEGylated polyion complex (PIC) nanoparticles for enhancing PIC internalisation in cells utilising block copolymer combinations with mismatched ionic chain lengths
Source: Royal Society of Chemistry journal article supplement (doi:10.1039/d3tb02049e), 2024-01-01
Supplement: d3tb02049e1.pdf [file d3tb02049e1.pdf]

## Electronic Supplementary Information

### Effective design for PEGylated polyion complex (PIC) nanoparticles to enhance cell–PIC interaction utilising block copolymer combinations of mismatching ionic chain lengths

**Fadlina Aulia<sup>a</sup>, Hiroaki Matsuba<sup>a</sup>, Shoya Adachi<sup>a</sup>, Takumi Yamada<sup>a</sup>, Ikuhiko Nakase<sup>g</sup>,  
Teruki Nii<sup>b</sup>, Takeshi Mori<sup>b,c</sup>, Yoshiki Katayama<sup>b,f</sup>, Akihiro Kishimura<sup>\*b-d</sup>**

- a Graduate School of Systems Life Sciences, Kyushu University, 744 Moto-oka, Nishi-ku, Fukuoka 819-0395, Japan
- b Department of Applied Chemistry, Faculty of Engineering, Kyushu University, 744 Moto-oka, Nishi-ku, Fukuoka 819-0395, Japan
- c Centre for Future Chemistry, Kyushu University, 744 Moto-oka, Nishi-ku, Fukuoka 819-0395, Japan
- d Center for Molecular Systems, Kyushu University, 744 Moto-oka, Nishi-ku, Fukuoka 819-0395, Japan
- e Center for Advanced Medical Open Innovation, Kyushu University, 744 Moto-oka, Nishi-ku, Fukuoka 819-0395, Japan
- f Department of Biomedical Engineering, Chung Yuan Christian University, 200 Chung Pei Rd., Chung Li, Taiwan, 32023, ROC
- g Department of Biological Chemistry, Graduate School of Science, Osaka Metropolitan University, 1-2, Gakuen-cho, Naka-ku, Sakai, Osaka 599-8570, Japan

---

\* Corresponding author's email address: kishimura.akihiro.776@m.kyushu-u.ac.jp

## 1. Characterization of polymers

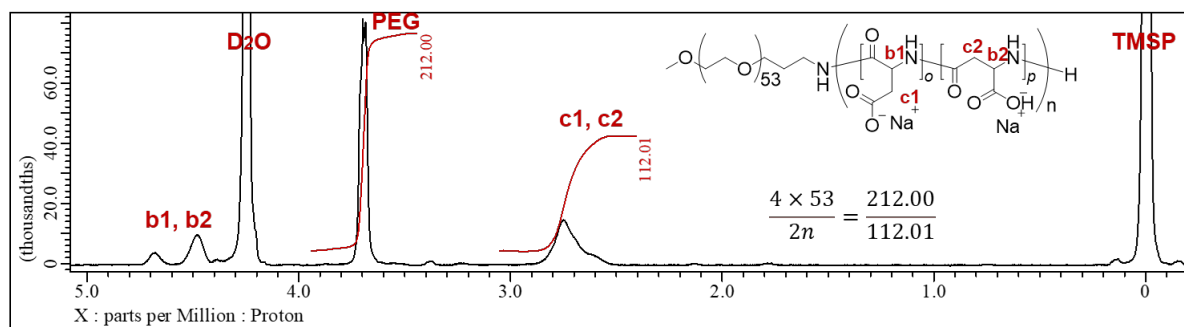

**Figure S1.** A  $^1\text{H-NMR}$  spectrum of  $\text{PEG}_{2k}\text{-PAsp}$  (10 mg mL $^{-1}$ ,  $\text{D}_2\text{O}$ ) at 80 °C with TMSP as an internal standard. DP was calculated to be 56.

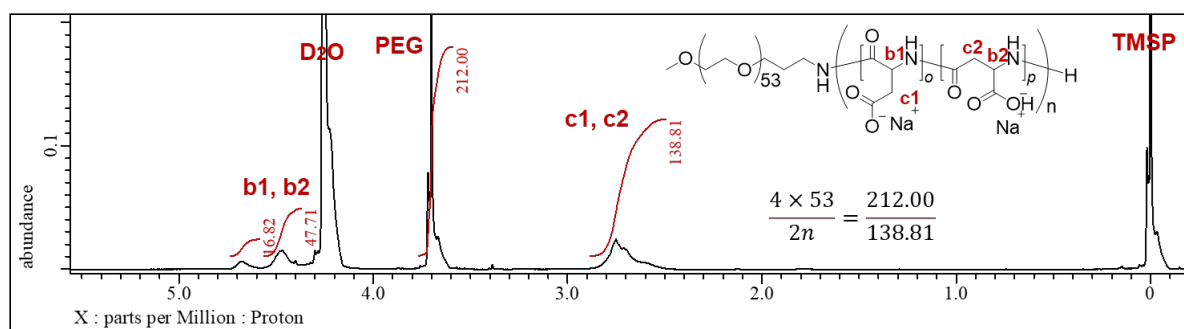

**Figure S2.** A  $^1\text{H-NMR}$  spectrum of  $\text{PEG}_{2k}\text{-PAsp}$  (10 mg mL $^{-1}$ ,  $\text{D}_2\text{O}$ ) at 80 °C with TMSP as an internal standard. DP was calculated to be 69.

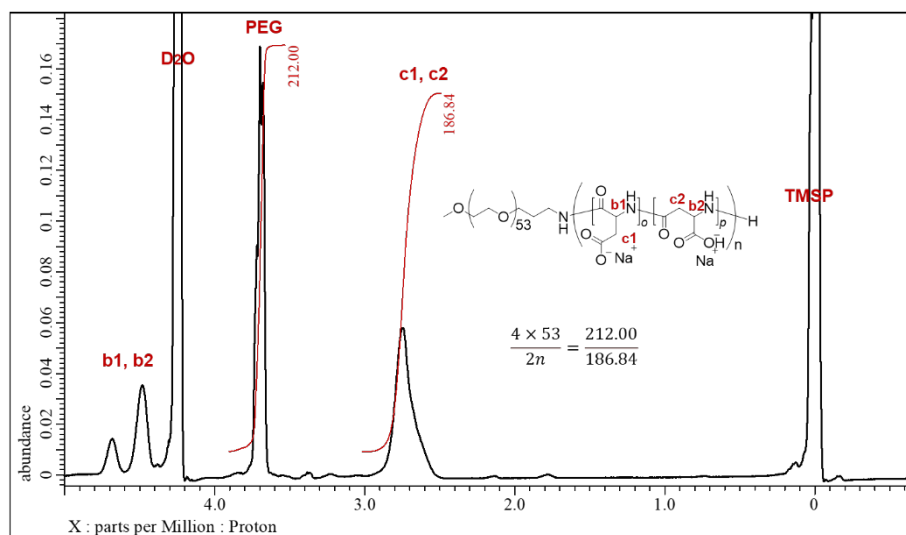

**Figure S3.** A  $^1\text{H-NMR}$  spectrum of  $\text{PEG}_{2k}\text{-PAsp}$  (10 mg mL $^{-1}$ ,  $\text{D}_2\text{O}$ ) at 80 °C with TMSP as an internal standard. DP was calculated to be 93.

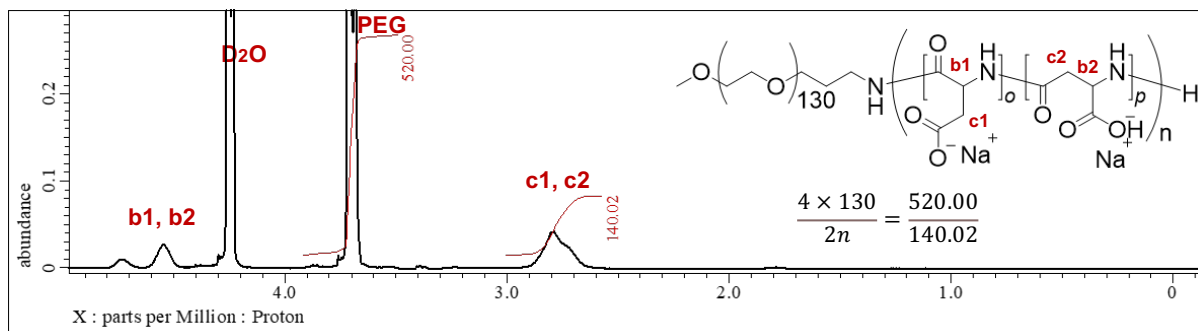

**Figure S4.** A  $^1\text{H-NMR}$  spectrum of PEG<sub>5k</sub>-PAsp ( $10 \text{ mg mL}^{-1}$ ,  $\text{D}_2\text{O}$ ) at  $80^\circ\text{C}$ . DP was calculated to be 70.

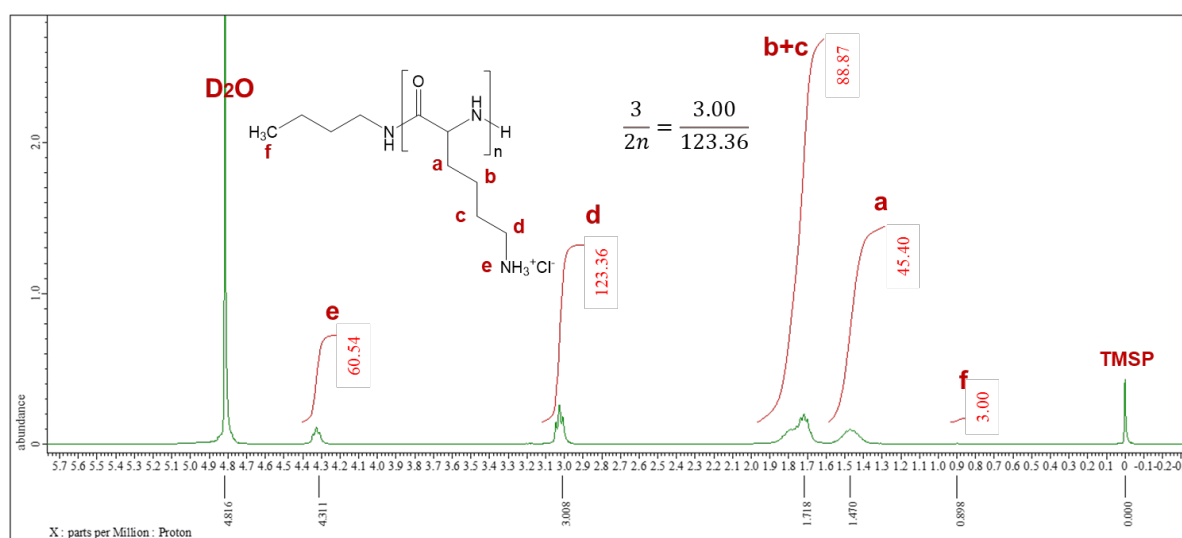

**Figure S5.** A  $^1\text{H-NMR}$  spectrum of homo-PLL ( $10 \text{ mg mL}^{-1}$ ,  $\text{D}_2\text{O}$ ) at  $25^\circ\text{C}$  with TMSP as an internal standard. DP was calculated to be 64.

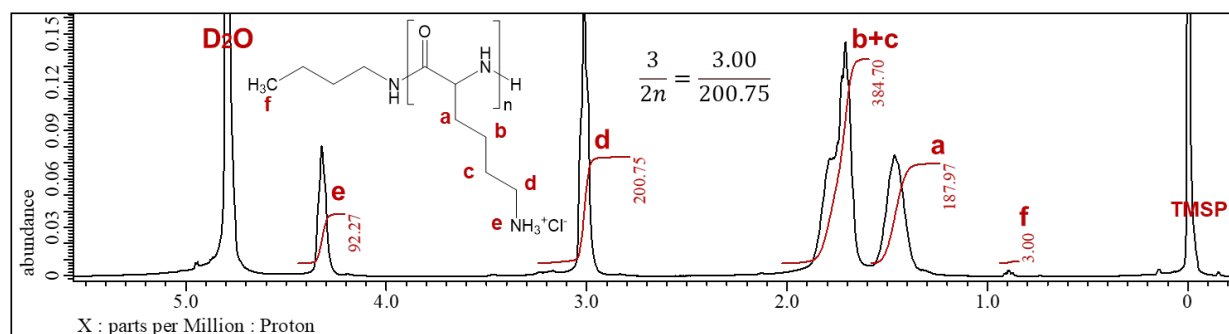

**Figure S6.** A  $^1\text{H-NMR}$  spectrum of homo-PLL ( $10 \text{ mg mL}^{-1}$ ,  $\text{D}_2\text{O}$ ) at  $25^\circ\text{C}$  with TMSP as an internal standard. DP was calculated to be 100.

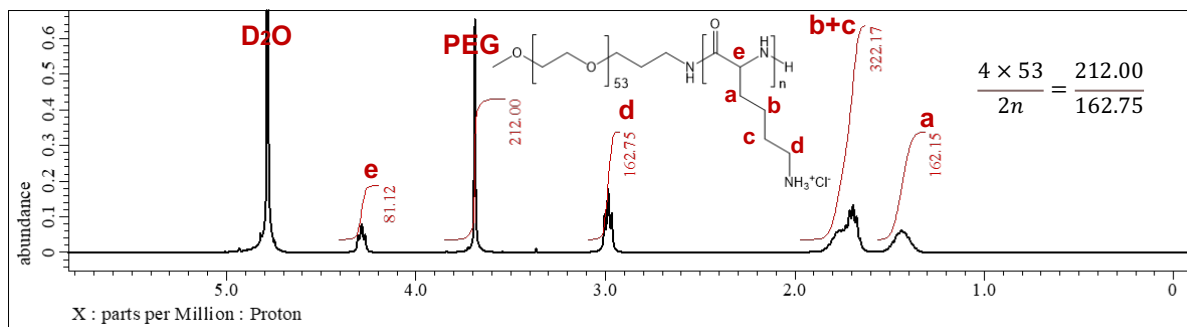

**Figure S7.** A  $^1\text{H-NMR}$  spectrum of  $\text{PEG}_{2k}\text{-PLL}$  ( $10 \text{ mg mL}^{-1}$ ,  $\text{D}_2\text{O}$ ) at  $25^\circ\text{C}$ . DP was calculated to be 81.

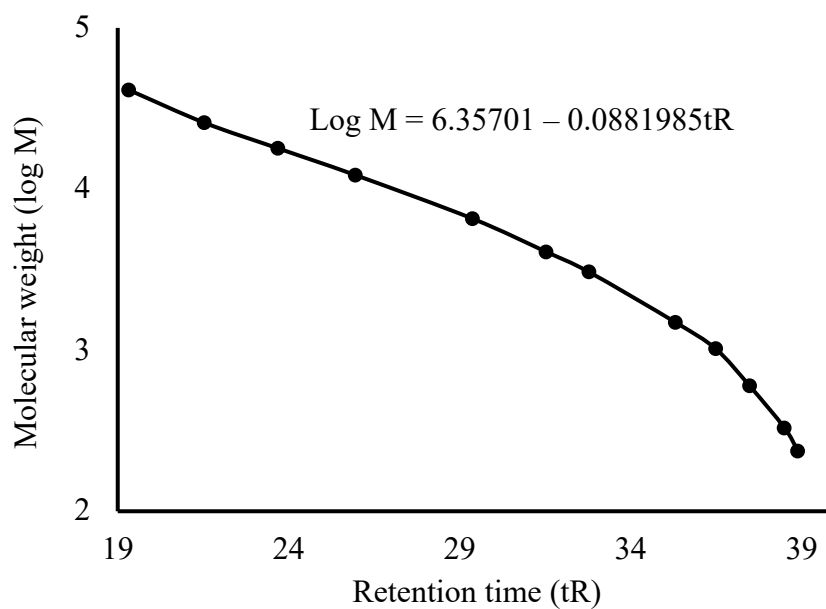

**Figure S8.** An SEC calibration curve of PEO standards

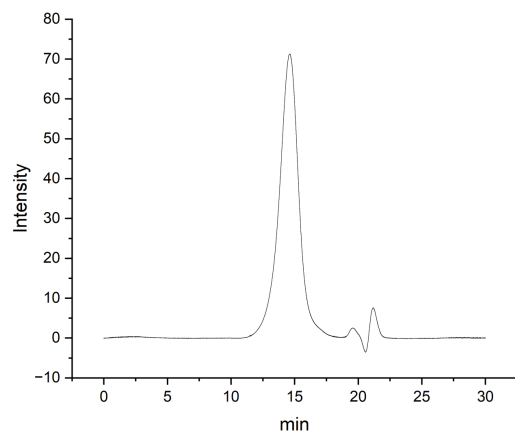

**Figure S9.** A size-exclusion chromatogram of PEG<sub>2k</sub>-PAsp<sub>56</sub>.

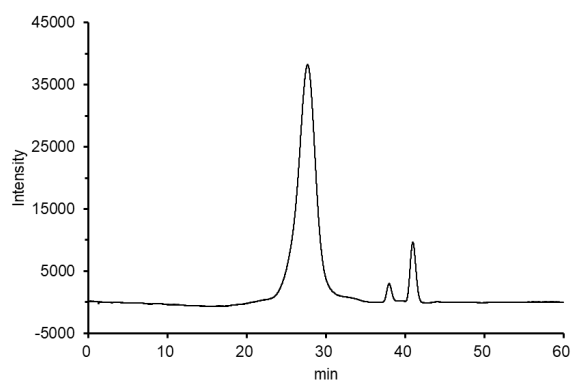

**Figure S10.** A size-exclusion chromatogram of PEG<sub>2k</sub>-PAsp<sub>69</sub>.

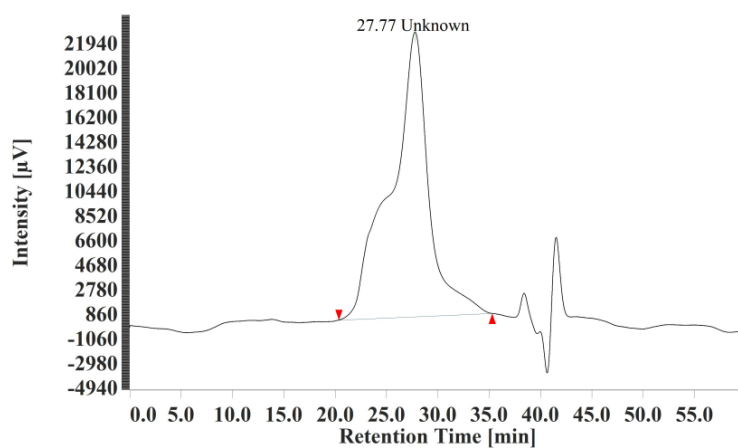

**Figure S11.** A size-exclusion chromatogram of PEG<sub>2k</sub>-PAsp<sub>93</sub>.

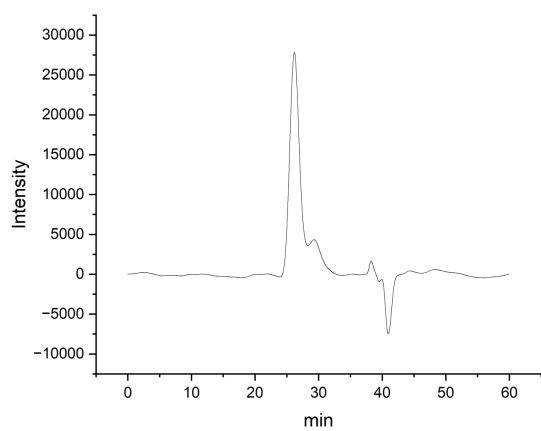

**Figure S12.** A size-exclusion chromatogram of PEG<sub>5k</sub>-PAsp.

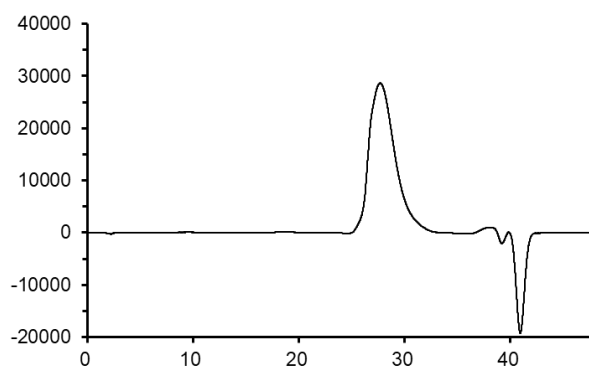

**Figure S13.** A size-exclusion chromatogram of homo-PLL<sub>64</sub>.

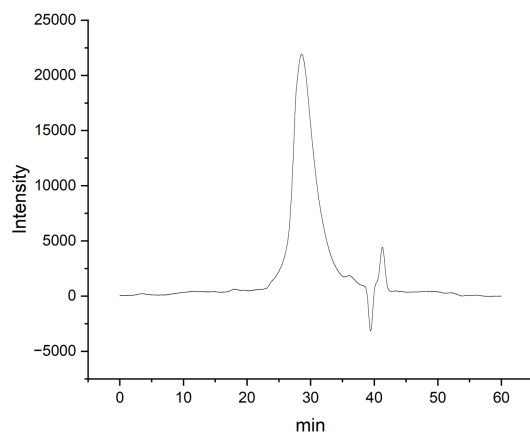

**Figure S14.** A size-exclusion chromatogram of homo-PLL<sub>100</sub>.

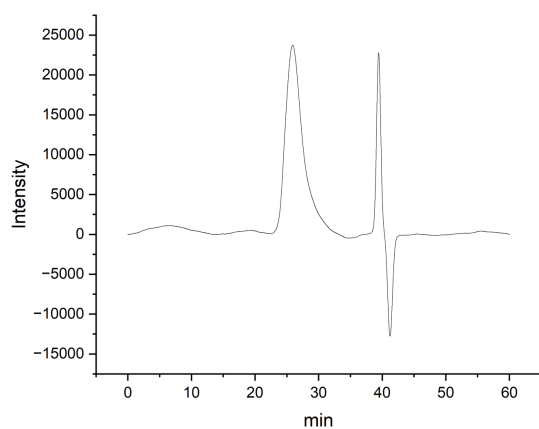

**Figure S15.** A size-exclusion chromatogram of PEG<sub>2k</sub>-PLL.

## 2. Characterization of PICs

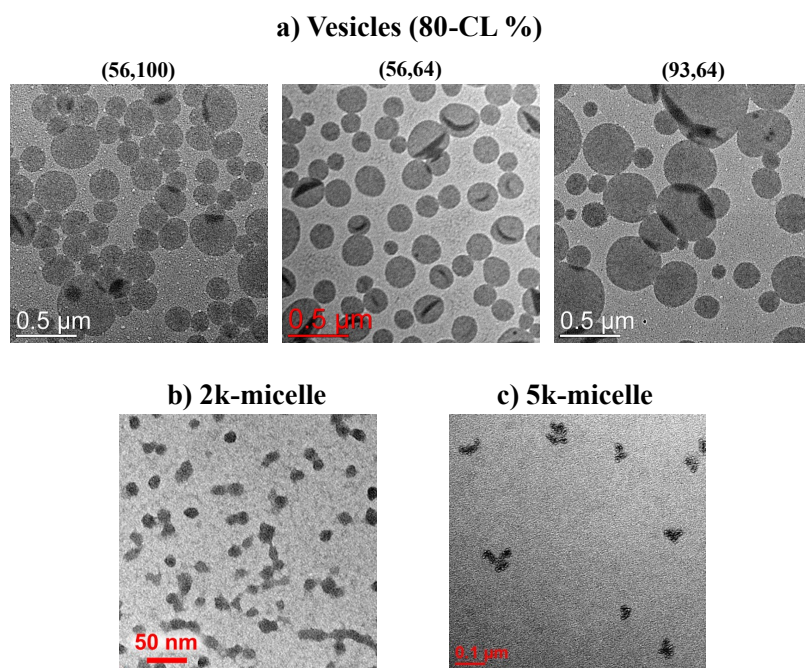

**Figure S16.** TEM images of the PICs: (a) vesicles, (b) 2k-micelle, and (c) 5k-micelle.

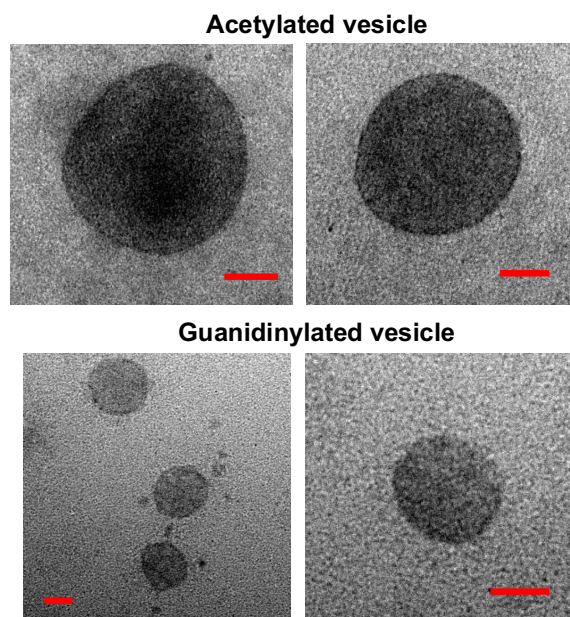

**Figure S17.** TEM images of Acetylated and Guanidinylated vesicles

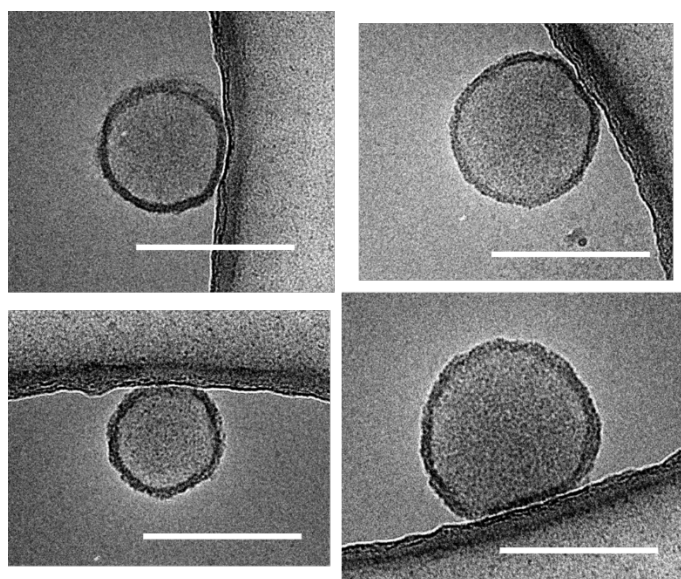

**Figure S18.** Cryo-TEM images of vesicle PIC (56,100) with 50%-CL (Scale bar: 200 nm). The thickness of the PIC membrane was estimated to be  $12.0 \pm 2.5$  nm (N = 28).

**Equation S1.** The equation to determine the mixing ratio of polyanion and polycation solutions for the PIC fabrication

$$= \frac{(\text{conc. of polyanion}) \times (\text{polyanion solution volume}) \times (\text{DP of polyanion}) \times (\text{ionization degree of carboxylate})}{\text{MW of polyanion}}$$

$$= \frac{(\text{conc. of polycation}) \times (\text{polycation solution volume}) \times (\text{DP of polycation}) \times (\text{ionization degree of amine})}{\text{MW of polycation}}$$



Note:

Conc. Of polyanion and polycation are set to be 1 mg/mL.

Ionization rate of carboxyl at pH 7.4 is 0.92.<sup>31</sup>

Ionization rate of amine at pH 7.4 is 0.95.<sup>31</sup>

**Scheme S1.** Schematic drawing of TNBS assay.

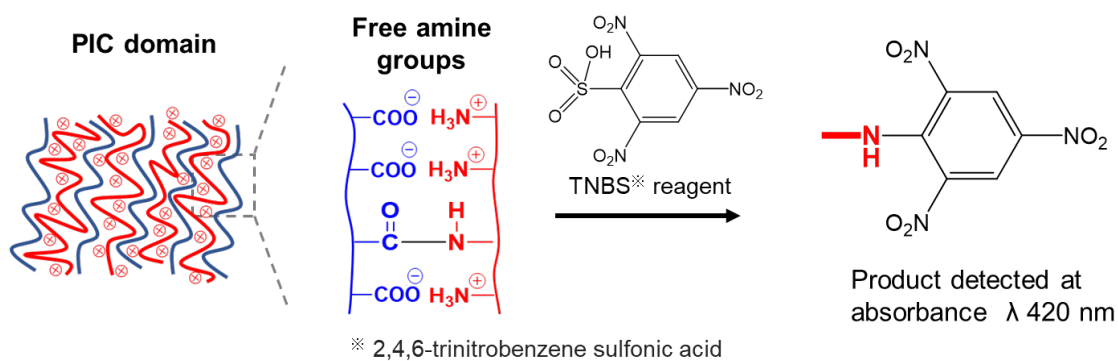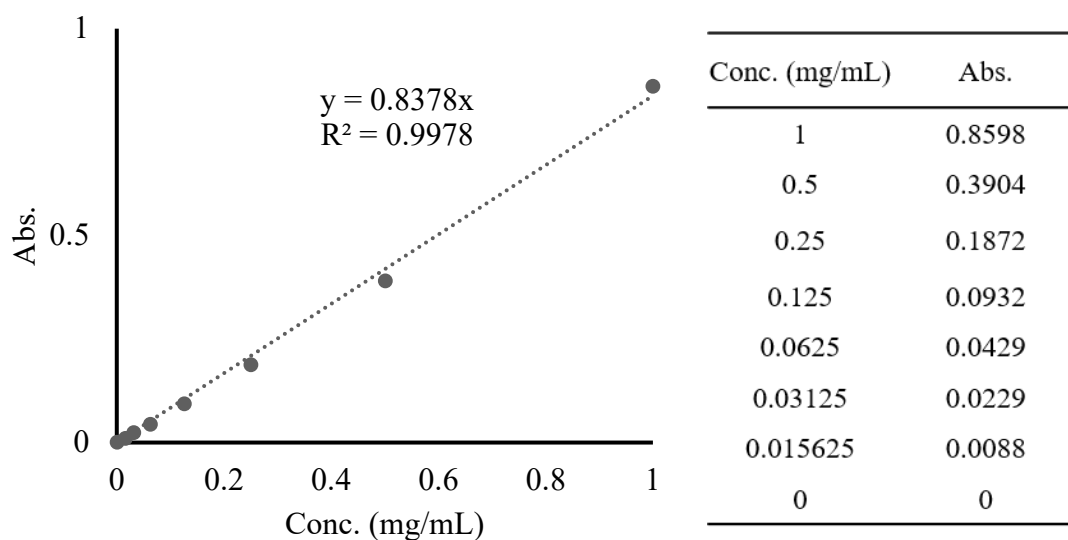

**Figure S19.** A TNBS assay calibration curve obtained using homo-PLL

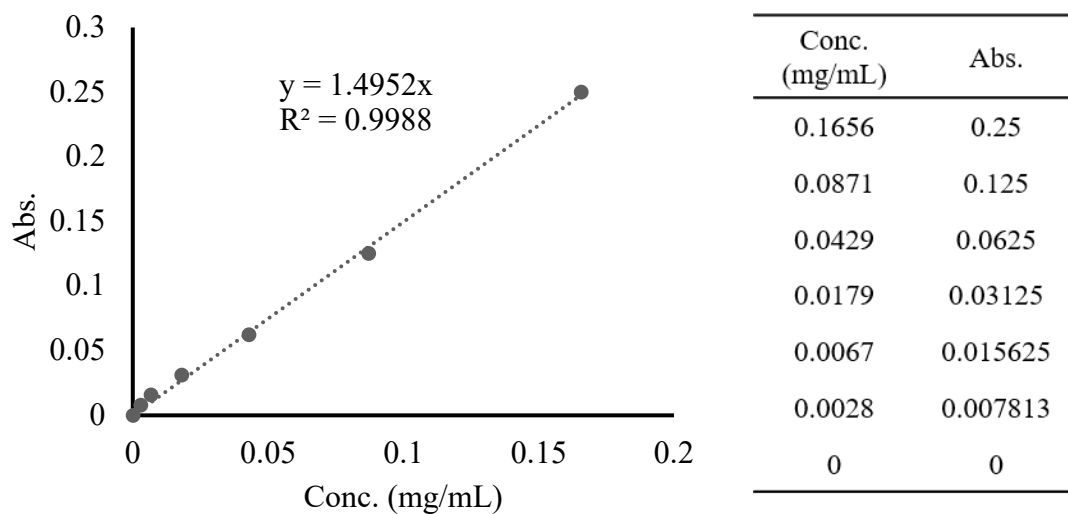

**Figure S20.** A TNBS assay calibration curve obtained using PEG<sub>2k</sub>-PLL

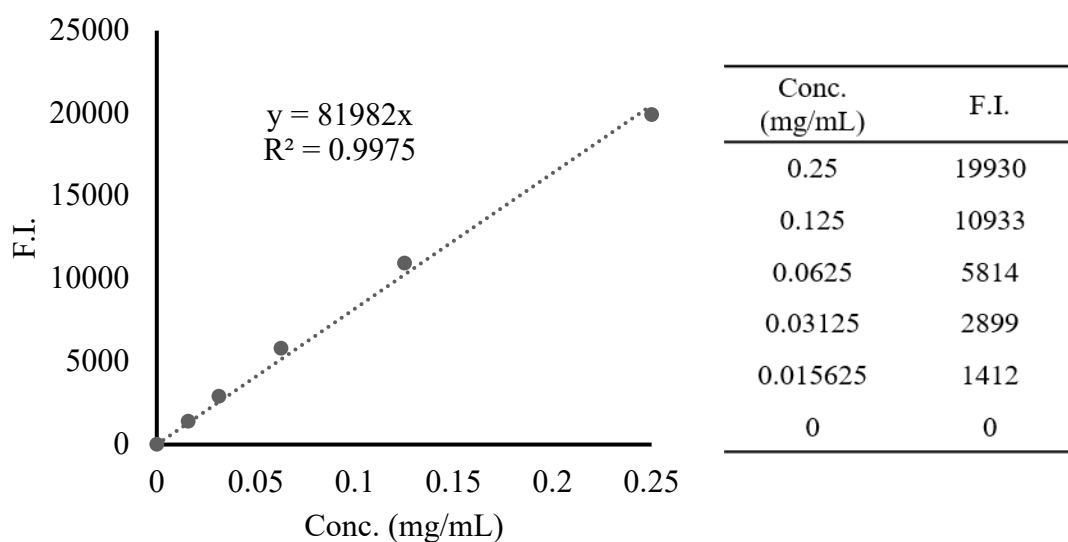

**Figure S21.** A Cy3-fluorescence calibration curve obtained using PEG<sub>2k</sub>-PAsp-Cy3

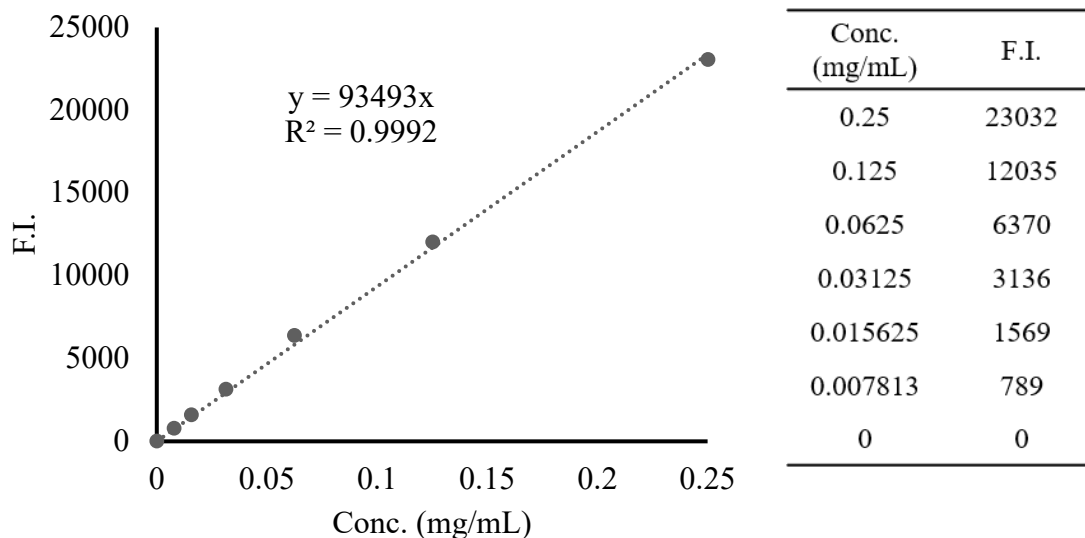

**Figure S22.** A Cy3-fluorescence calibration curve obtained using PEG<sub>5k</sub>-PAsp-Cy3

**Equation S2.** The equation to determine the crosslinking degree

*Remaining amine ratio (%)*

$$= \frac{(DP \text{ of polycation}) \times (\text{ionization degree of amino groups}) \times (\text{apparent conc. of polycation from TNBS assay})}{(MW \text{ of polycation})}$$

$$\times \frac{(MW \text{ of polyanion})}{(\text{conc. of polyanion}) \times (DP \text{ of polyanion}) \times (\text{ionization degree of carboxylate})} \times 100$$

$$\text{Crosslinking degree (\%)} = 100 - [\text{amount of free amino groups (\%)}]$$

**Equation S3.** The equation for calculation of PEG weight fraction,  $f_{\text{PEG}}$ , of PICs

$$f_{\text{PEG}} = \frac{(\text{PEG MW}) \times (\text{mole fraction of PEGylated ionomer})}{\text{total molecular weight of charge neutralized complex in mole}}$$

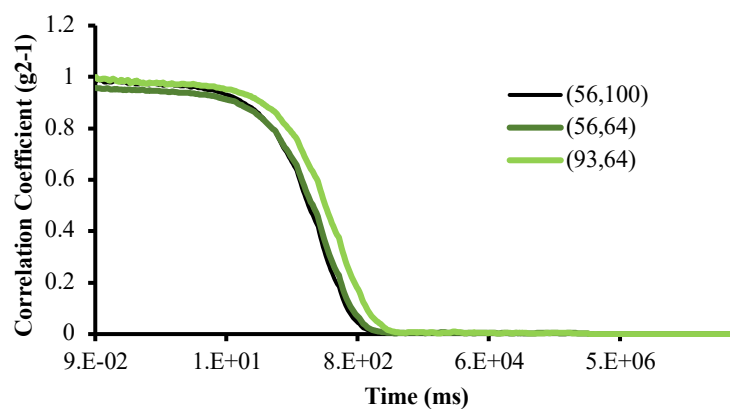

**Figure S23.** Autocorrelation functions of PIC vesicles

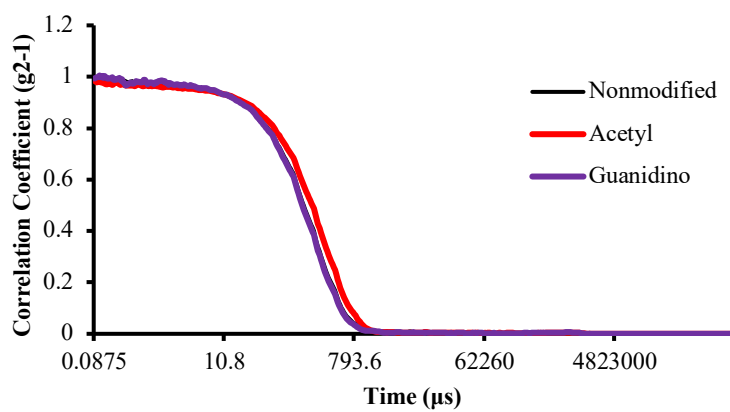

**Figure S24.** Autocorrelation functions of non- and modified- PIC vesicles

### 3. Cell experiment results

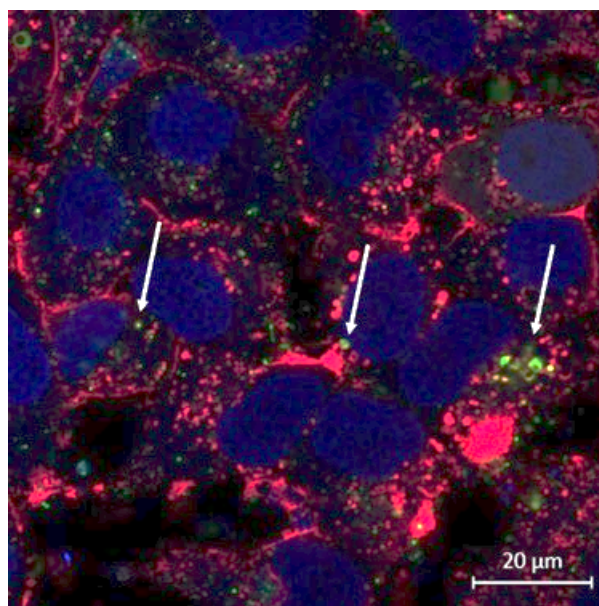

**Fig. S25** The result of calcein leakage assay of PIC vesicle in HeLa cells obtained by CLSM. Blue: nuclei; Red: PIC; Green: calcein; Yellow: PIC+calcein colocalization. Briefly, HeLa was incubated with medium containing PIC (56, 100) (equal to final PAsp conc. 0.02 mg/mL) and calcein (final conc. 0.1 mg/mL) for 24 hours. Calcein leakage indicating endosomal escape, which will dye the cell with green color of whole cell body upon calcein dissolution into cytosol.

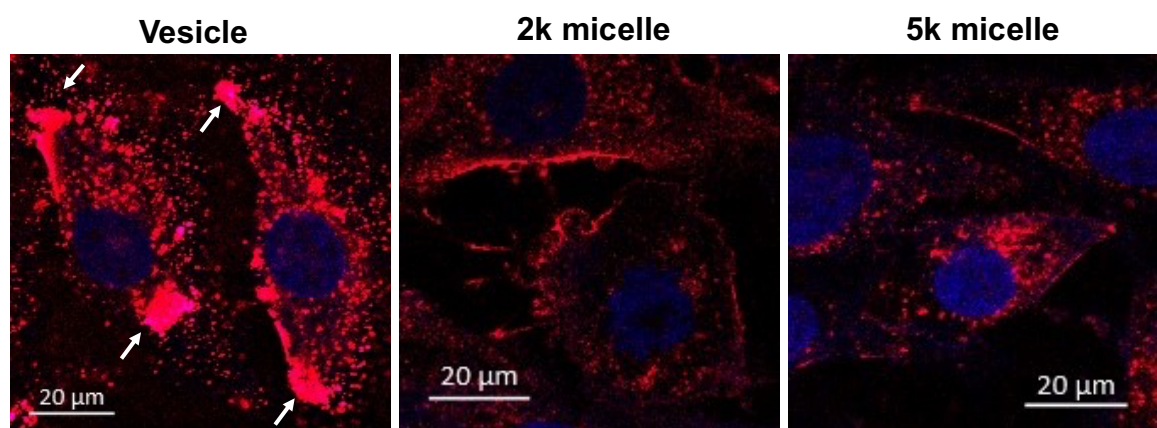

**Figure S26.** PIC retention on the HeLa cell surface observed after 24 h of incubation. (Blue: nucleus; Red: PICs). Aggregates are indicated by white arrows. The contrast of pictures was adjusted to yield a clear appearance of the PIC position.

## Vesicle

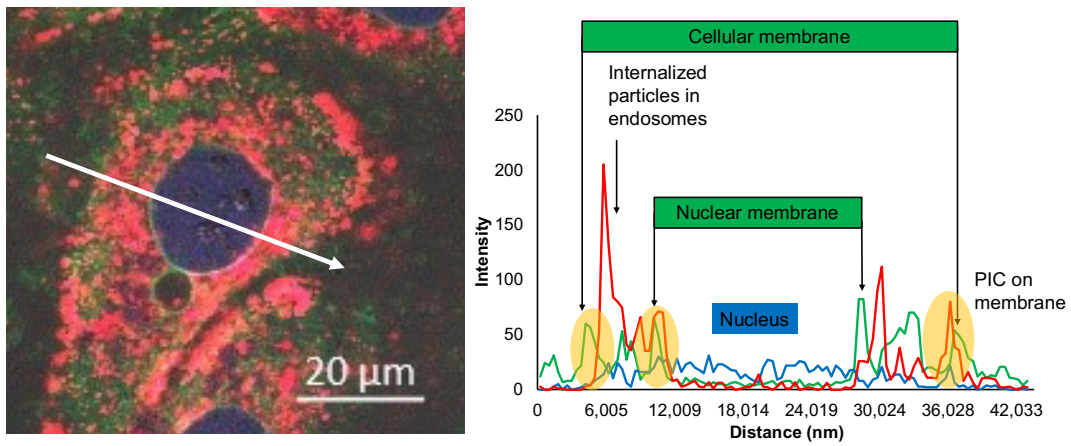

## 2k micelle

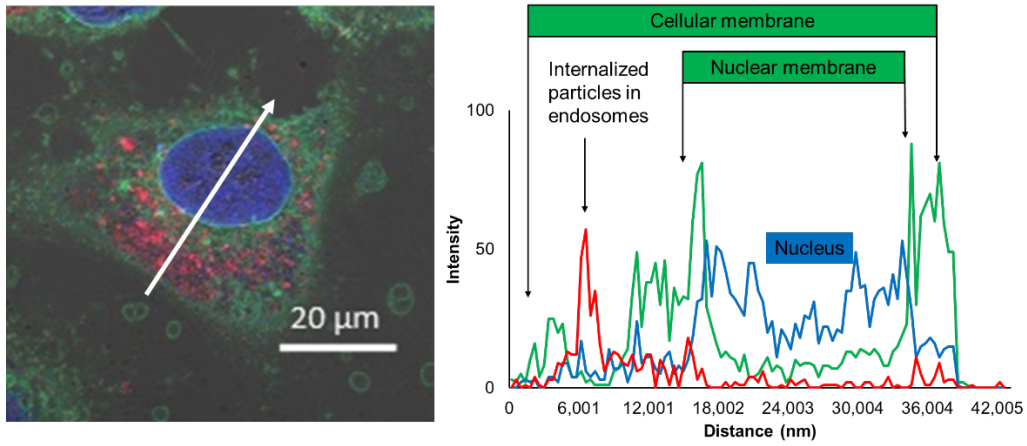

## 5k micelle

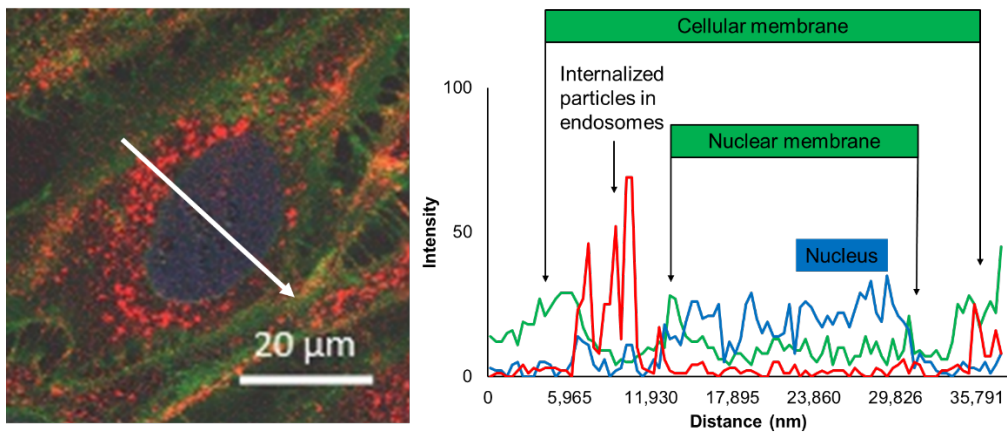

**Figure S27.** Line profilings of fluorescence intensity across HeLa cells treated with (a) PIC vesicles, (b) 2k-micelle, and (c) 5k-micelle. Left: CLSM images of HeLa cells used for line profiling analysis (scan lines are shown in each image as a white arrow). Right: Line profiling results (Green line: An intensity profile of the green

fluorescence from Cellbrite® (Biotium, Fremont, CA, a cellular membrane staining dye with green fluorescence, used according to manufacturer's protocol). Blue line: An intensity profile of blue fluorescence from Hoechst3324; Red line: An intensity profile of red fluorescence from Cy3-labelled PICs.)

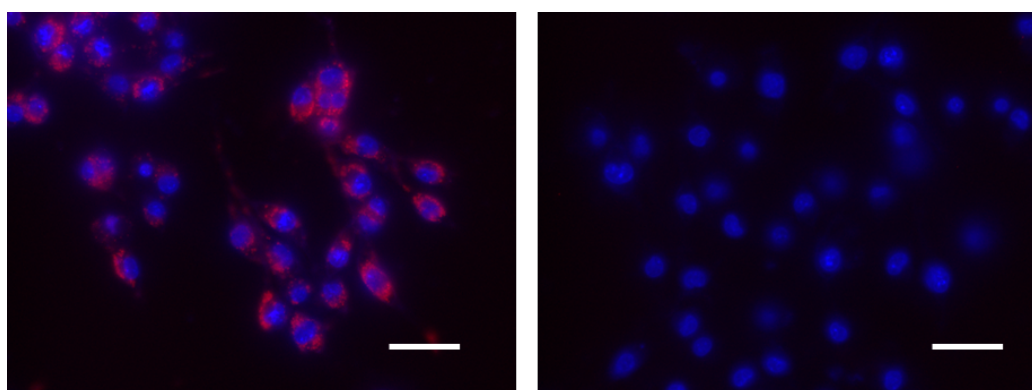

Scale bar: 50  $\mu$ m

**Figure S28.** Fluorescence microscopy images of RAW 264.7 cells after 24 h of incubation with the acetylated PIC vesicle in the absence (left) and presence (right) of dextran sulphate (DexSO<sub>4</sub>) 0.5 mg/mL. Blue: Nucleus (Hoechst 33342); red: acetylated vesicles.

**(a) HeLa**

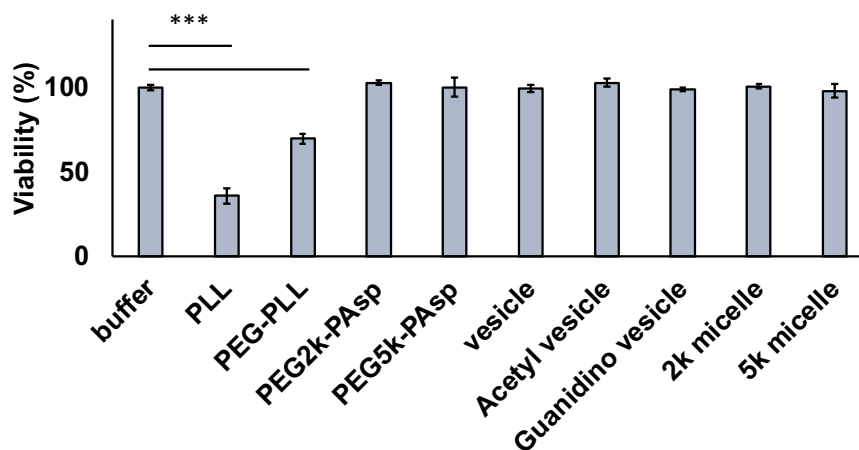

**(b) RAW 264.7**

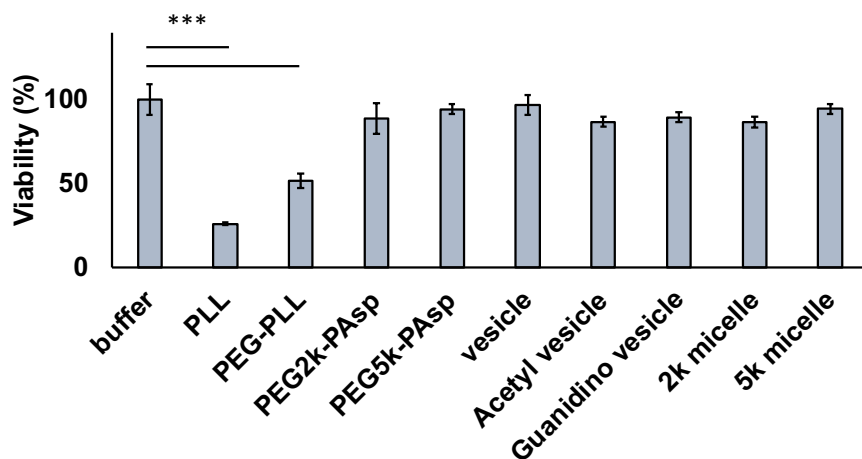

(c) Caco2

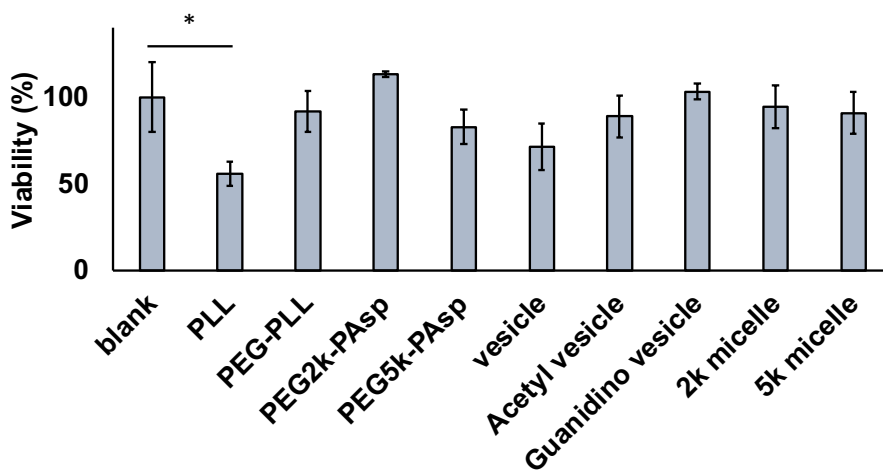

(d) DC2.4

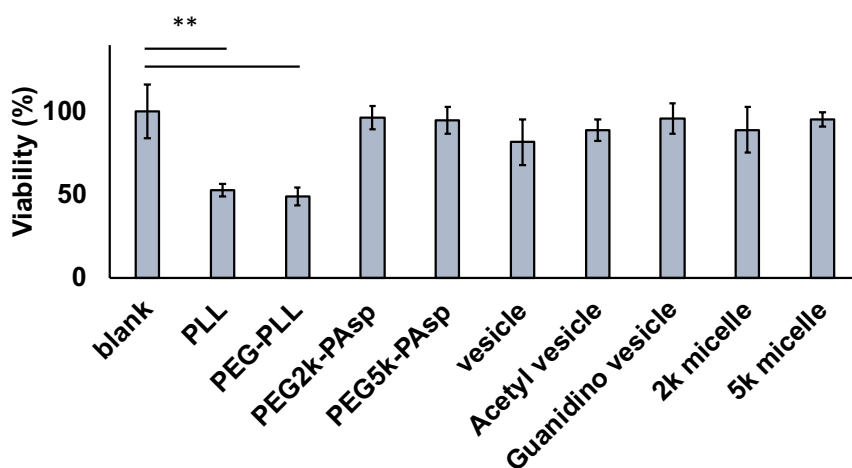

**Figure S29.** Cytotoxicity assays of PICs in different cell lines. (a) HeLa, (b) RAW 264.7, (c) Caco2 and (d) DC2.4.
